# Supplementary material for: Phenyl-capped cyclopenta[c]chalcogenophenes: synthesis, crystal structures, electrochemistry and theoretical insights
Source: Royal Society of Chemistry journal article supplement (doi:10.1039/c4ra05687f), 2014-07-30
Supplement: c4ra05687f1.pdf [file c4ra05687f1.pdf]

## Supporting Information

# Phenyl-capped cyclopenta[*c*]chalcogenophenes: synthesis, crystal structures, electrochemistry and theoretical insights

Anjan Bedi<sup>a</sup>, Sashi Debnath<sup>a</sup>, Hemant S. Chandak<sup>b</sup>, Sanjio S. Zade<sup>a\*</sup>

<sup>a</sup>*Department of Chemical Sciences, Indian Institute of Science Education and Research (IISER) Kolkata, Mohanpur 741252, India.*

<sup>b</sup>*Department of Chemistry, G. S. Science, Arts and Commerce College, Khamgaon-444303, India*

[\*] email: [sanjiozade@iiserkol.ac.in](mailto:sanjiozade@iiserkol.ac.in)

| Contents                                                                                                                                                                             | Page number |
|--------------------------------------------------------------------------------------------------------------------------------------------------------------------------------------|-------------|
| <b>Fig. S1</b> <sup>1</sup> H NMR of compound <b>2</b>                                                                                                                               | <b>S2</b>   |
| <b>Fig. S2</b> <sup>13</sup> C NMR of compound <b>2</b>                                                                                                                              | <b>S3</b>   |
| <b>Fig. S3</b> <sup>1</sup> H NMR of compound <b>PhCPTPh</b>                                                                                                                         | <b>S4</b>   |
| <b>Fig. S4</b> <sup>13</sup> C NMR of compound <b>PhCPTPh</b>                                                                                                                        | <b>S5</b>   |
| <b>Fig. S5</b> <sup>1</sup> H NMR of compound <b>PhCPSPH</b>                                                                                                                         | <b>S6</b>   |
| <b>Fig. S6</b> <sup>13</sup> C NMR of compound <b>PhCPSPH</b>                                                                                                                        | <b>S7</b>   |
| <b>Fig. S7</b> DSC thermogram of <b>PhCPTPh</b> (above) and <b>PhCPSPH</b> (below)                                                                                                   | <b>S8</b>   |
| <b>Fig S8</b> Fingerprint plot of (a) <b>PhCPTPh</b> and (b) <b>PhCPSPH</b> . The outline of the full fingerprint is shown in gray while C...S and C...Se interaction shown in blue. | <b>S9</b>   |
| <b>Table S1.</b> Relative contribution of different interactions to the total Hirshfeld surface.                                                                                     | <b>S9</b>   |
| <b>Table S2.</b> Important short contacts in the crystals.                                                                                                                           | <b>S9</b>   |
| <b>Table S3.</b> Crystallographic data and refinement parameters for <b>PhCPTPh</b> and <b>PhCPSPH</b> .                                                                             | <b>S10</b>  |
| Coordinates for optimized geometry of <b>PhCPTPh</b>                                                                                                                                 | <b>S11</b>  |
| Coordinates for optimized geometry of cation radical of <b>PhCPTPh</b>                                                                                                               | <b>S12</b>  |
| Coordinates for optimized geometry of <b>PhCPSPH</b>                                                                                                                                 | <b>S13</b>  |
| Coordinates for optimized geometry of cation radical of <b>PhCPTPh</b>                                                                                                               | <b>S14</b>  |

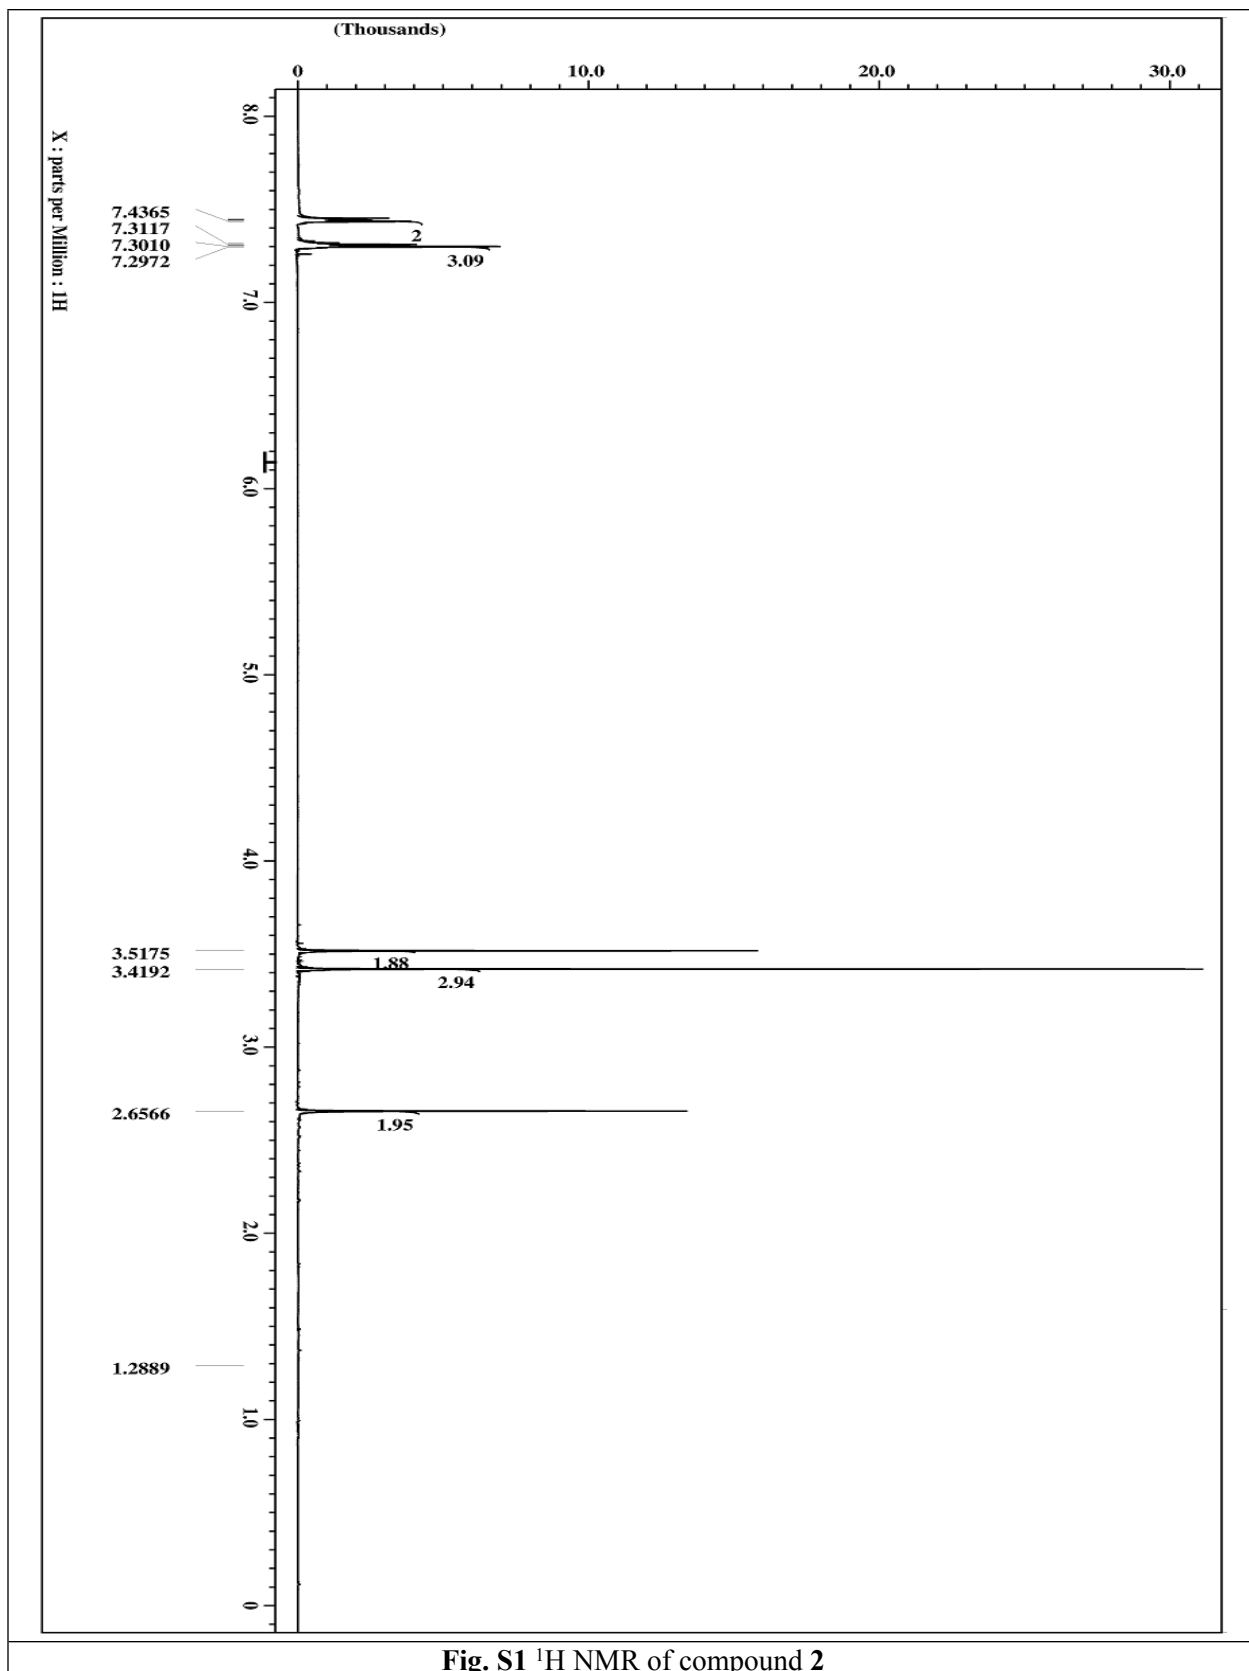

Fig. S1 <sup>1</sup>H NMR of compound 2

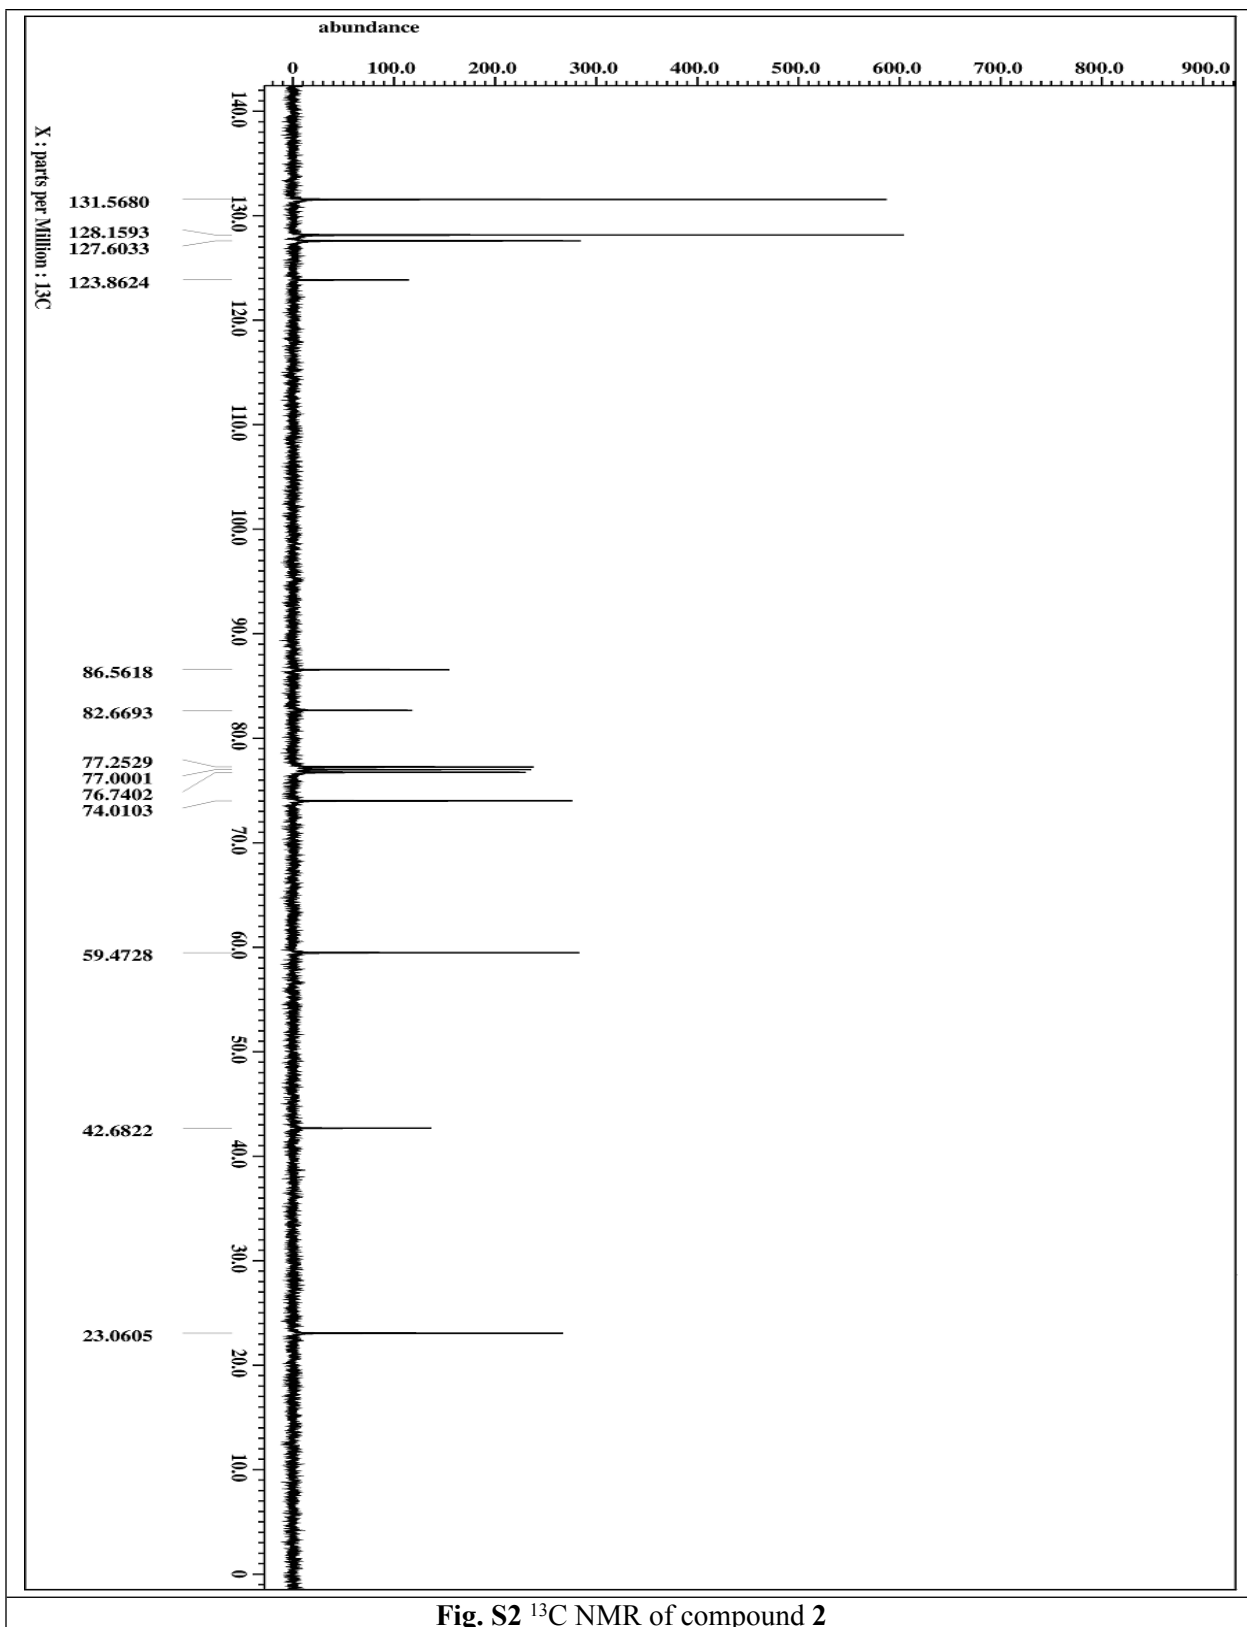

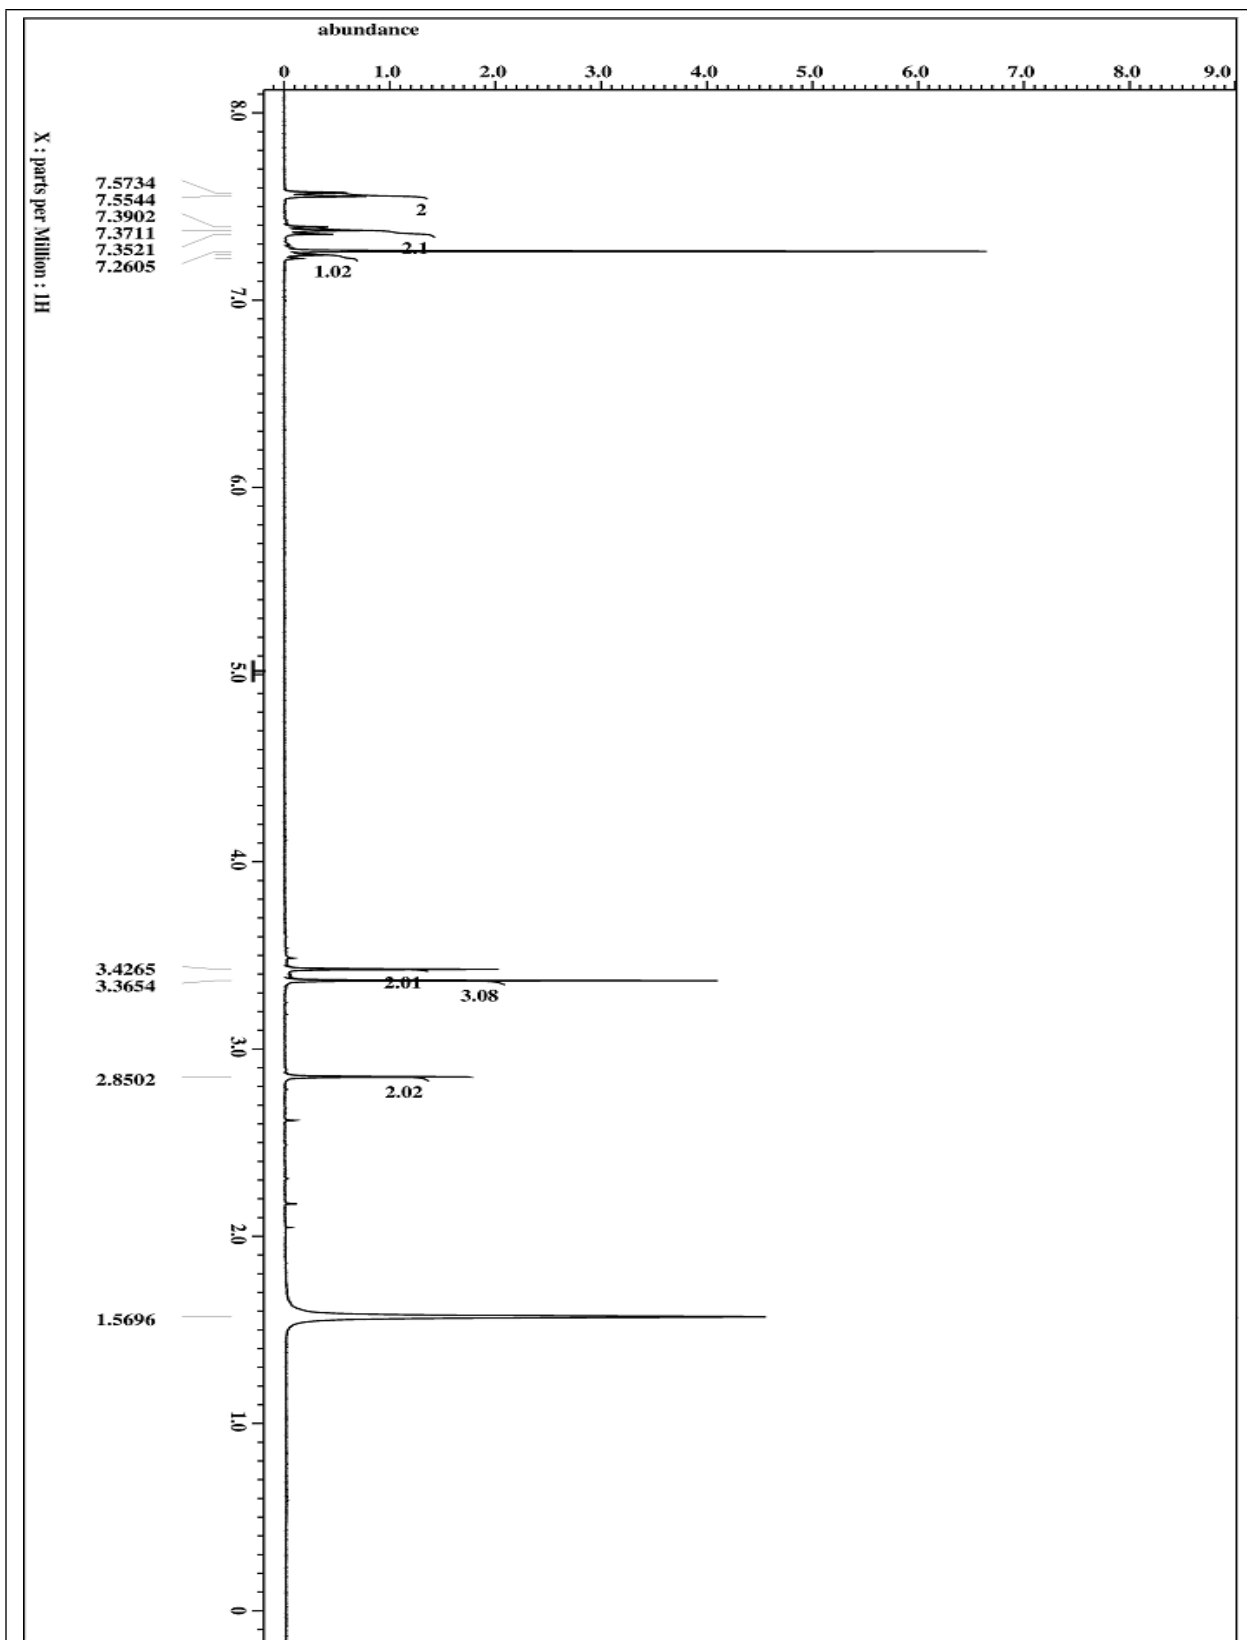

Fig. S3 <sup>1</sup>H NMR of compound PhCTPh

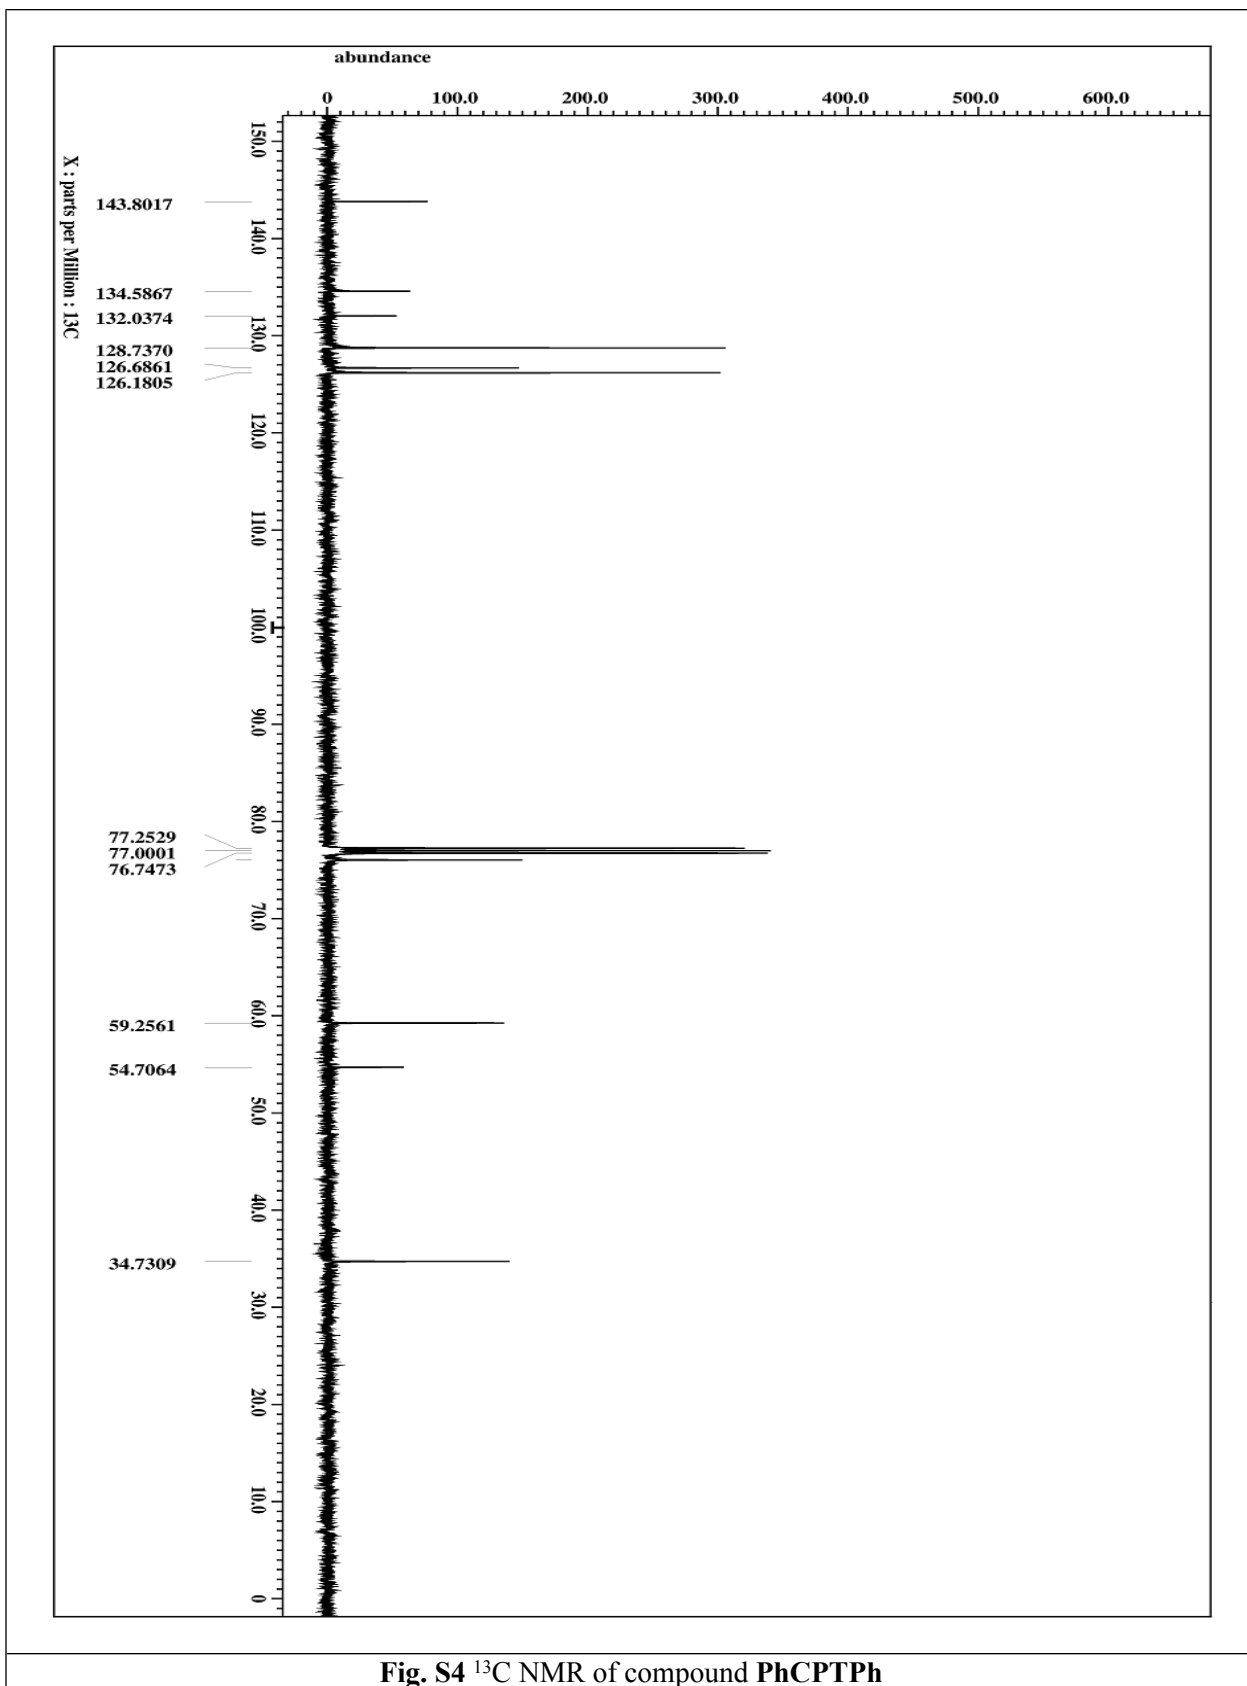

**Fig. S4**  $^{13}\text{C}$  NMR of compound PhCPTPh

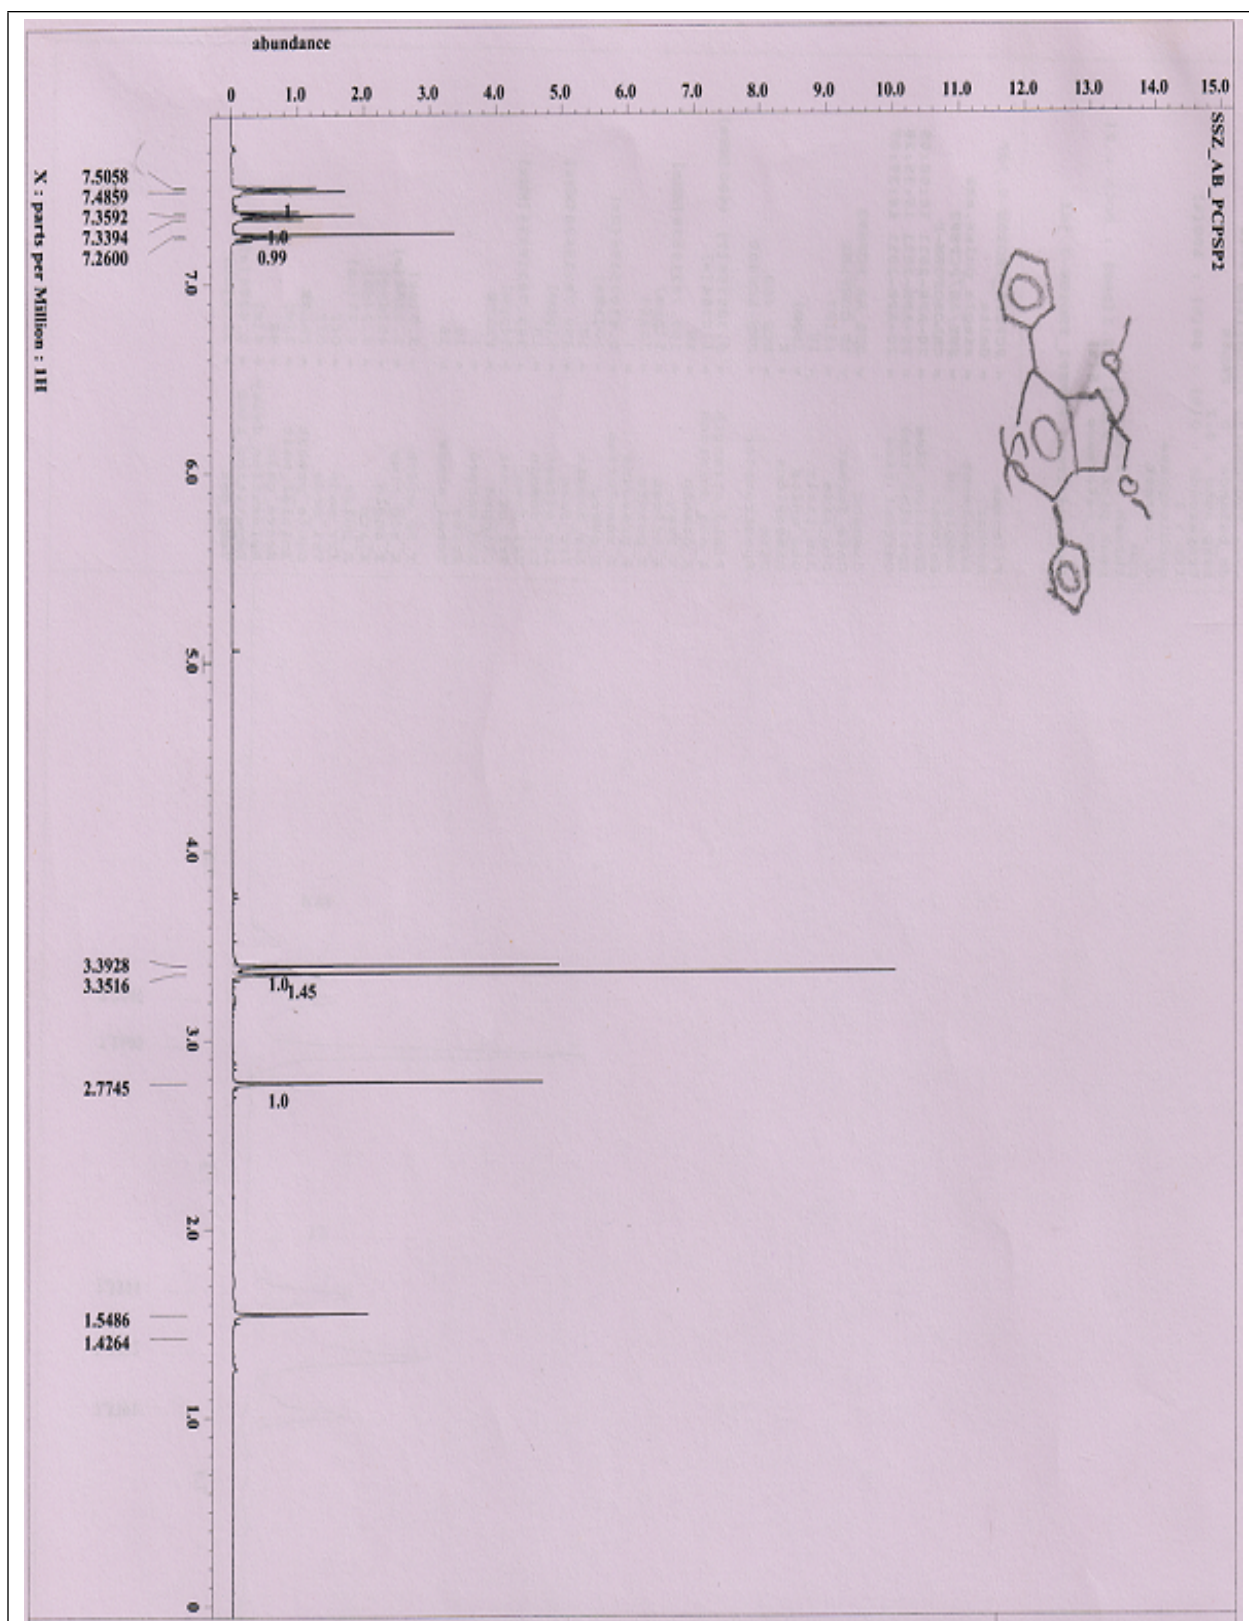

Fig. S5  $^1\text{H}$  NMR of compound PhCSPPh

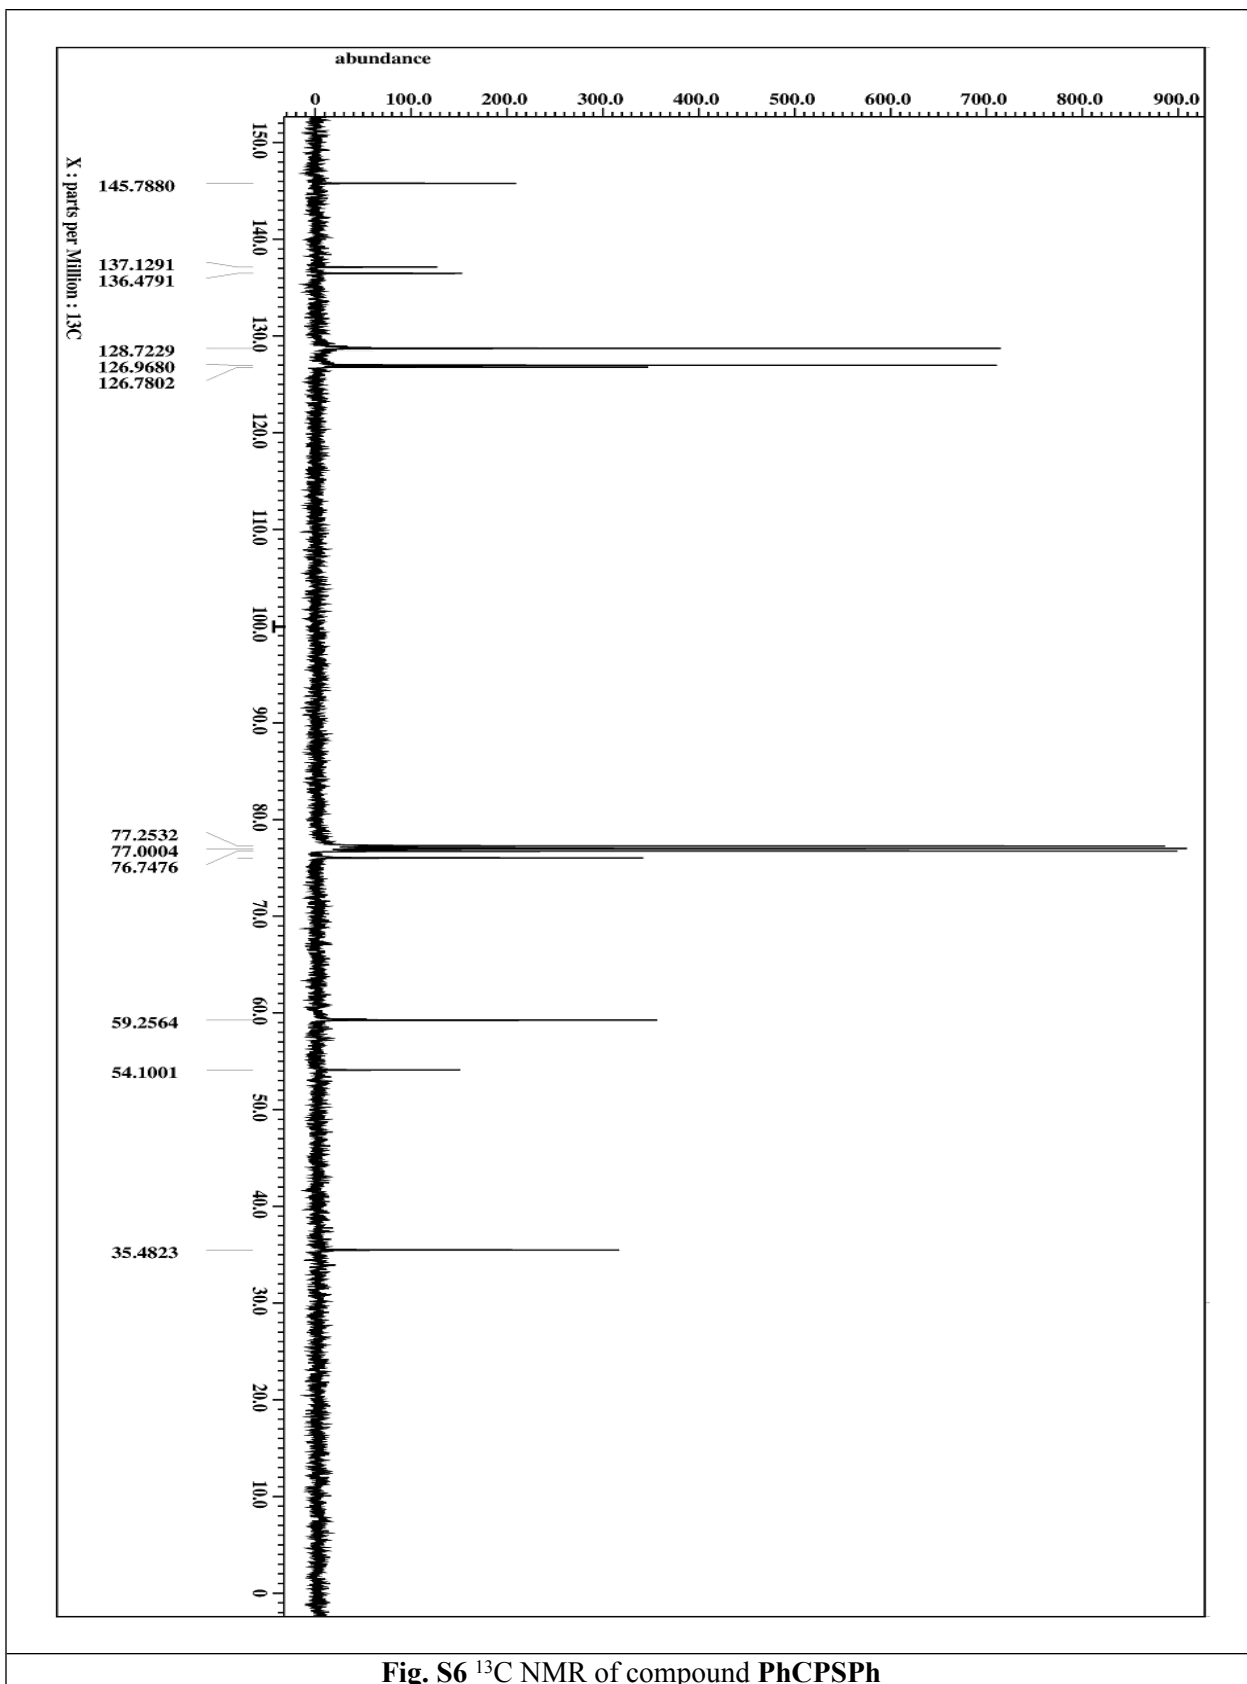

**Fig. S6**  $^{13}\text{C}$  NMR of compound PhCPSPh

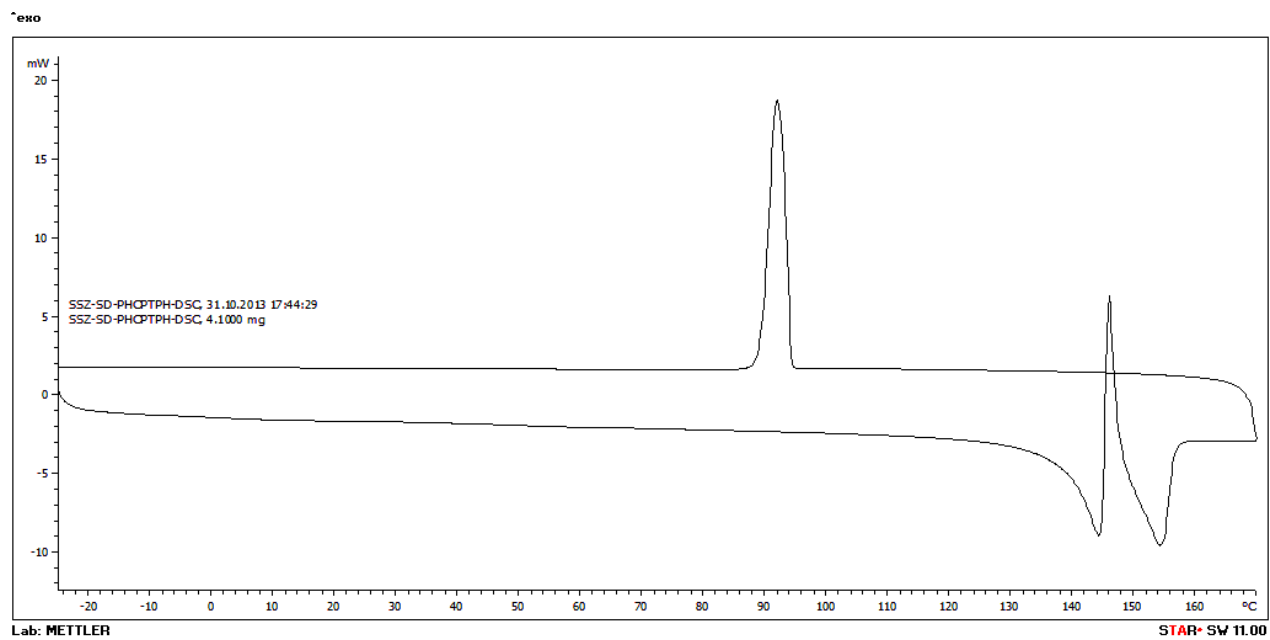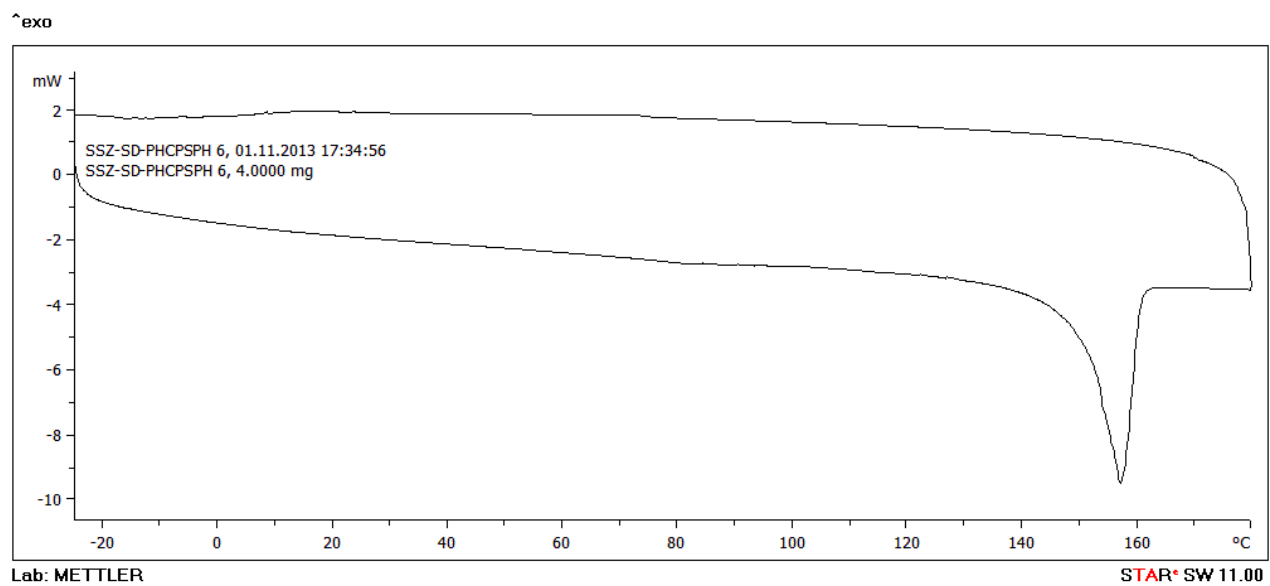

**Fig. S7.** DSC thermogram of **PhCPTPh** (above) and **PhCPSPh** (below)



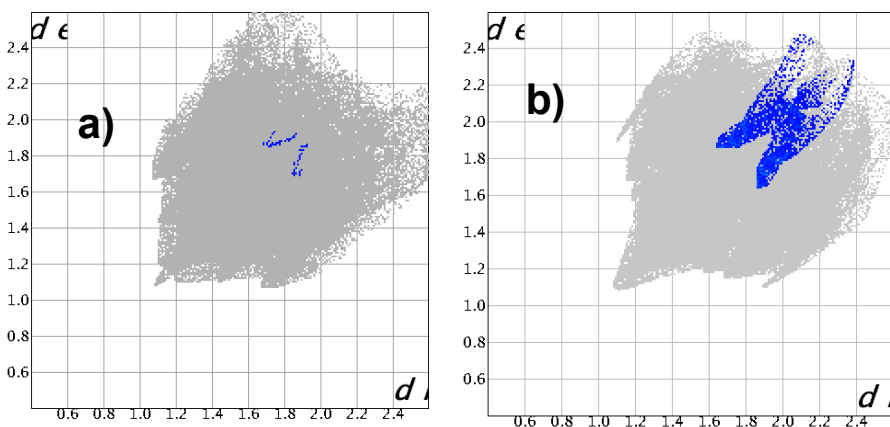

**Fig S8.** Fingerprint plot of the compound, a) PhCPTPh and (b) PhCPSPh The outline of the full fingerprint is shown in gray while C...S and C...Se interaction shown in blue.

**Table S1** Relative contribution of different interactions to the total Hirshfeld surface

| PhCPTPh |      | PhCPSPh |      |
|---------|------|---------|------|
| Contact | %    | Contact | %    |
| H...H   | 57.9 | H...H   | 61.3 |
| C...H   | 30.6 | C...H   | 26.7 |
| O...H   | 5.4  | O...H   | 5.3  |
| S...H   | 5.1  | Se...H  | 3.6  |
| S...C   | 0.1  | Se...C  | 2.7  |

**Table S2.** Important short contacts in the crystals

| Number of types | PhCPTPh            |                 | PhCPSPh            |                 |
|-----------------|--------------------|-----------------|--------------------|-----------------|
|                 | anticipating atoms | bond length (Å) | anticipating atoms | bond length (Å) |
| 1               | C6...H20B          | 2.898           | C23...Se1          | 3.514           |
| 2               | S1...C14           | 3.488           | H20...H20          | 2.377           |
| 3               | O1...H23A          | 2.634           | C1...C12           | 3.353           |
| 4               | C13...H2           | 2.896           | C7...H12B          | 2.897           |
| 5               | C4...H18B          | 2.849           | –                  | –               |
| 6               | O2...H4            | 2.651           | –                  | –               |

**Table S3.** Crystallographic data and refinement parameters for **PhCPTPh** and **PhCPSPh**

| Parameters                                                                                   | PhCPTPh                                                         | PhCPSPh                                                         |
|----------------------------------------------------------------------------------------------|-----------------------------------------------------------------|-----------------------------------------------------------------|
| Empirical formula                                                                            | C <sub>23</sub> H <sub>24</sub> O <sub>2</sub> S                | C <sub>23</sub> H <sub>24</sub> O <sub>2</sub> Se               |
| Formula weight                                                                               | 364.49                                                          | 411.38                                                          |
| Crystal system                                                                               | Monoclinic                                                      | Monoclinic                                                      |
| Space group                                                                                  | C2/c                                                            | C2/c                                                            |
| <i>T</i> (K)                                                                                 | 153 K                                                           | 273 K                                                           |
| <i>a</i> (Å)                                                                                 | 40.4991(18)                                                     | 34.8342(19)                                                     |
| <i>b</i> (Å)                                                                                 | 5.9278(1)                                                       | 5.7765(3)                                                       |
| <i>c</i> (Å)                                                                                 | 16.1917(6)                                                      | 22.9523(12)                                                     |
| $\alpha$ (°)                                                                                 | 90                                                              | 90                                                              |
| $\beta$ (°)                                                                                  | 106.414(6)                                                      | 123.607(1)                                                      |
| $\gamma$ (°)                                                                                 | 90                                                              | 90                                                              |
| <i>Z</i>                                                                                     | 8                                                               | 8                                                               |
| <i>V</i> (Å <sup>3</sup> )                                                                   | 3728.7(2)                                                       | 3846.5(4)                                                       |
| <i>D<sub>x</sub></i> (g/cm <sup>3</sup> )                                                    | 1.299                                                           | 1.421                                                           |
| Radiation                                                                                    | MoK $\alpha$                                                    | MoK $\alpha$                                                    |
| $\mu$ (Mo K $\alpha$ )/mm <sup>-1</sup>                                                      | 0.188                                                           | 1.966                                                           |
| <i>F</i> (0 0 0)                                                                             | 1552.0                                                          | 1696                                                            |
| Crystal size/mm                                                                              | 0.39 × 0.31 × 0.20                                              | 0.40 × 0.31 × 0.21                                              |
| $\theta$ range for data collection (°)                                                       | 2.26–31.41                                                      | 2.81–33.71                                                      |
| Limiting indices                                                                             | $-47 \leq h \leq 48, -7 \leq k \leq 7, -14 \leq l \leq 13$      | $-44 \leq h \leq 44, -6 \leq k \leq 7, -27 \leq l \leq 29$      |
| Reflections collected                                                                        | 15721                                                           | 20054                                                           |
| Independent reflections                                                                      | 3273                                                            | 4203                                                            |
| Observed reflections                                                                         | 3049                                                            | 3049                                                            |
| Goodness-of-fit on <i>F</i> <sup>2</sup>                                                     | 1.09                                                            | 1.079                                                           |
| <i>R<sub>I</sub></i> and <i>wR<sub>2</sub></i> indices [ <i>I</i> > 2 $\sigma$ ( <i>I</i> )] | <i>R</i> <sub>1</sub> = 0.0356, <i>wR</i> <sub>2</sub> = 0.0860 | <i>R</i> <sub>1</sub> = 0.0239, <i>wR</i> <sub>2</sub> = 0.0547 |
| <i>R<sub>I</sub></i> and <i>wR<sub>2</sub></i> (all data)                                    | <i>R</i> <sub>1</sub> = 0.0381, <i>wR</i> <sub>2</sub> = 0.0879 | <i>R</i> <sub>1</sub> = 0.0307, <i>wR</i> <sub>2</sub> = 0.0572 |
| CCDC deposition number                                                                       | 995427                                                          | 998094                                                          |

## Coordinates for optimized geometry of PhCPTPh

| Center<br>Number | Atomic<br>Number | Atomic<br>Type | Coordinates (Angstroms) |           |           |
|------------------|------------------|----------------|-------------------------|-----------|-----------|
|                  |                  |                | X                       | Y         | Z         |
| 1                | 6                | 0              | -2.899591               | -1.285386 | -0.284814 |
| 2                | 6                | 0              | -3.504055               | -2.353813 | 0.405474  |
| 3                | 1                | 0              | -2.882808               | -3.051381 | 0.960457  |
| 4                | 6                | 0              | -4.887015               | -2.516160 | 0.406551  |
| 5                | 1                | 0              | -5.327790               | -3.348512 | 0.948949  |
| 6                | 6                | 0              | -5.704813               | -1.611342 | -0.273573 |
| 7                | 1                | 0              | -6.784129               | -1.736076 | -0.268596 |
| 8                | 6                | 0              | -5.121164               | -0.545950 | -0.961694 |
| 9                | 1                | 0              | -5.745306               | 0.160734  | -1.502559 |
| 10               | 6                | 0              | -3.737193               | -0.386553 | -0.973424 |
| 11               | 1                | 0              | -3.297761               | 0.428500  | -1.538657 |
| 12               | 6                | 0              | -1.444454               | -1.104680 | -0.291026 |
| 13               | 6                | 0              | -0.692943               | 0.037928  | -0.440727 |
| 14               | 6                | 0              | -1.002897               | 1.506179  | -0.599114 |
| 15               | 1                | 0              | -1.836867               | 1.854200  | 0.017242  |
| 16               | 1                | 0              | -1.254667               | 1.742565  | -1.644331 |
| 17               | 6                | 0              | 0.335029                | 2.208133  | -0.194769 |
| 18               | 6                | 0              | 0.325437                | 2.522530  | 1.310181  |
| 19               | 1                | 0              | 0.234572                | 1.586150  | 1.886334  |
| 20               | 1                | 0              | 1.276134                | 3.002243  | 1.587033  |
| 21               | 6                | 0              | -0.832812               | 3.728240  | 2.970541  |
| 22               | 1                | 0              | -0.968658               | 2.839610  | 3.607897  |
| 23               | 1                | 0              | -1.695825               | 4.388196  | 3.093765  |
| 24               | 1                | 0              | 0.073638                | 4.257670  | 3.305355  |
| 25               | 6                | 0              | 0.550094                | 3.490832  | -0.999521 |
| 26               | 1                | 0              | 0.503659                | 3.263873  | -2.079457 |
| 27               | 1                | 0              | -0.247679               | 4.214784  | -0.772369 |
| 28               | 6                | 0              | 2.080212                | 5.249491  | -1.341581 |
| 29               | 1                | 0              | 2.081237                | 5.121447  | -2.436480 |
| 30               | 1                | 0              | 3.070438                | 5.587105  | -1.023773 |
| 31               | 1                | 0              | 1.338666                | 6.023334  | -1.086143 |
| 32               | 6                | 0              | 1.448282                | 1.143784  | -0.469056 |
| 33               | 1                | 0              | 1.866619                | 1.293575  | -1.474430 |
| 34               | 1                | 0              | 2.288188                | 1.233041  | 0.228818  |
| 35               | 6                | 0              | 0.713904                | -0.170476 | -0.367415 |
| 36               | 6                | 0              | 1.083782                | -1.479453 | -0.160618 |
| 37               | 6                | 0              | 2.416415                | -2.072711 | -0.011443 |
| 38               | 6                | 0              | 3.542233                | -1.463914 | -0.599547 |
| 39               | 1                | 0              | 3.415668                | -0.565247 | -1.193957 |
| 40               | 6                | 0              | 4.812897                | -2.016001 | -0.452266 |
| 41               | 1                | 0              | 5.665116                | -1.527584 | -0.917726 |
| 42               | 6                | 0              | 4.992395                | -3.194408 | 0.274517  |
| 43               | 1                | 0              | 5.983585                | -3.625492 | 0.385033  |
| 44               | 6                | 0              | 3.884588                | -3.814695 | 0.856055  |
| 45               | 1                | 0              | 4.009843                | -4.731007 | 1.426983  |
| 46               | 6                | 0              | 2.614649                | -3.260087 | 0.719462  |
| 47               | 1                | 0              | 1.766263                | -3.740890 | 1.198694  |
| 48               | 8                | 0              | -0.761548               | 3.384109  | 1.603919  |
| 49               | 8                | 0              | 1.818107                | 4.034710  | -0.673956 |
| 50               | 16               | 0              | -0.363907               | -2.480646 | -0.080059 |

## Coordinates for optimized geometry of cation radical of PhCPTPh

| Center<br>Number | Atomic<br>Number | Atomic<br>Type | Coordinates (Angstroms) |           |           |
|------------------|------------------|----------------|-------------------------|-----------|-----------|
|                  |                  |                | X                       | Y         | Z         |
| 1                | 6                | 0              | -2.930449               | -1.174973 | -0.251292 |
| 2                | 6                | 0              | -3.575442               | -2.368538 | 0.172169  |
| 3                | 1                | 0              | -2.986429               | -3.199611 | 0.548477  |
| 4                | 6                | 0              | -4.955180               | -2.478720 | 0.140623  |
| 5                | 1                | 0              | -5.431529               | -3.394333 | 0.476197  |
| 6                | 6                | 0              | -5.735049               | -1.407415 | -0.317551 |
| 7                | 1                | 0              | -6.816930               | -1.496363 | -0.341571 |
| 8                | 6                | 0              | -5.120646               | -0.223828 | -0.745075 |
| 9                | 1                | 0              | -5.724512               | 0.601694  | -1.108294 |
| 10               | 6                | 0              | -3.739828               | -0.102456 | -0.712890 |
| 11               | 1                | 0              | -3.279859               | 0.810073  | -1.068603 |
| 12               | 6                | 0              | -1.497333               | -1.058368 | -0.223144 |
| 13               | 6                | 0              | -0.676351               | 0.085932  | -0.352656 |
| 14               | 6                | 0              | -0.938333               | 1.560333  | -0.507307 |
| 15               | 1                | 0              | -1.724594               | 1.941119  | 0.150323  |
| 16               | 1                | 0              | -1.240664               | 1.785735  | -1.540854 |
| 17               | 6                | 0              | 0.437432                | 2.219884  | -0.168393 |
| 18               | 6                | 0              | 0.449783                | 2.661281  | 1.307133  |
| 19               | 1                | 0              | 0.369596                | 1.779350  | 1.968740  |
| 20               | 1                | 0              | 1.407483                | 3.157711  | 1.521067  |
| 21               | 6                | 0              | -0.660995               | 4.078125  | 2.836413  |
| 22               | 1                | 0              | -0.765058               | 3.286774  | 3.594364  |
| 23               | 1                | 0              | -1.526561               | 4.741827  | 2.890184  |
| 24               | 1                | 0              | 0.250211                | 4.654474  | 3.052434  |
| 25               | 6                | 0              | 0.722724                | 3.418678  | -1.078831 |
| 26               | 1                | 0              | 0.611813                | 3.120806  | -2.137097 |
| 27               | 1                | 0              | -0.004370               | 4.219231  | -0.875741 |
| 28               | 6                | 0              | 2.393768                | 5.019845  | -1.552955 |
| 29               | 1                | 0              | 2.342081                | 4.848088  | -2.638815 |
| 30               | 1                | 0              | 3.421164                | 5.268626  | -1.278565 |
| 31               | 1                | 0              | 1.736943                | 5.864535  | -1.298784 |
| 32               | 6                | 0              | 1.498332                | 1.086936  | -0.359802 |
| 33               | 1                | 0              | 1.986638                | 1.177510  | -1.339284 |
| 34               | 1                | 0              | 2.295181                | 1.140930  | 0.389369  |
| 35               | 6                | 0              | 0.688884                | -0.180021 | -0.273714 |
| 36               | 6                | 0              | 1.001873                | -1.545217 | -0.082003 |
| 37               | 6                | 0              | 2.281147                | -2.191279 | 0.041132  |
| 38               | 6                | 0              | 3.475841                | -1.516804 | -0.327224 |
| 39               | 1                | 0              | 3.430714                | -0.512158 | -0.727247 |
| 40               | 6                | 0              | 4.705200                | -2.148397 | -0.215192 |
| 41               | 1                | 0              | 5.608186                | -1.623128 | -0.509798 |
| 42               | 6                | 0              | 4.783073                | -3.460326 | 0.268528  |
| 43               | 1                | 0              | 5.748486                | -3.949211 | 0.357499  |
| 44               | 6                | 0              | 3.616058                | -4.144519 | 0.636560  |
| 45               | 1                | 0              | 3.676661                | -5.159649 | 1.015656  |
| 46               | 6                | 0              | 2.383448                | -3.524065 | 0.523193  |
| 47               | 1                | 0              | 1.490333                | -4.059308 | 0.831584  |
| 48               | 8                | 0              | -0.633273               | 3.539198  | 1.524438  |
| 49               | 8                | 0              | 2.041658                | 3.853752  | -0.825799 |
| 50               | 16               | 0              | -0.486862               | -2.486554 | -0.004168 |

## Coordinates for optimized geometry of PhCPSPh

| Center<br>Number | Atomic<br>Number | Atomic<br>Type | Coordinates (Angstroms) |           |           |
|------------------|------------------|----------------|-------------------------|-----------|-----------|
|                  |                  |                | X                       | Y         | Z         |
| 1                | 6                | 0              | -2.935966               | -0.972568 | -0.288257 |
| 2                | 6                | 0              | -3.593195               | -1.959203 | 0.472744  |
| 3                | 1                | 0              | -3.002147               | -2.650814 | 1.067731  |
| 4                | 6                | 0              | -4.982600               | -2.044891 | 0.491800  |
| 5                | 1                | 0              | -5.463995               | -2.814578 | 1.089389  |
| 6                | 6                | 0              | -5.754889               | -1.141162 | -0.241341 |
| 7                | 1                | 0              | -6.839358               | -1.205479 | -0.223297 |
| 8                | 6                | 0              | -5.119643               | -0.155575 | -0.998975 |
| 9                | 1                | 0              | -5.708944               | 0.548497  | -1.580792 |
| 10               | 6                | 0              | -3.728976               | -0.073273 | -1.027136 |
| 11               | 1                | 0              | -3.249768               | 0.677995  | -1.645918 |
| 12               | 6                | 0              | -1.474425               | -0.876937 | -0.304302 |
| 13               | 6                | 0              | -0.666964               | 0.220813  | -0.459440 |
| 14               | 6                | 0              | -0.947141               | 1.696610  | -0.622121 |
| 15               | 1                | 0              | -1.786131               | 2.057601  | -0.020359 |
| 16               | 1                | 0              | -1.176619               | 1.934771  | -1.672126 |
| 17               | 6                | 0              | 0.394279                | 2.376084  | -0.201905 |
| 18               | 6                | 0              | 0.387280                | 2.658521  | 1.309192  |
| 19               | 1                | 0              | 0.284967                | 1.711450  | 1.865400  |
| 20               | 1                | 0              | 1.343263                | 3.121267  | 1.596750  |
| 21               | 6                | 0              | -0.757927               | 3.842738  | 2.993698  |
| 22               | 1                | 0              | -0.903894               | 2.942547  | 3.612351  |
| 23               | 1                | 0              | -1.613575               | 4.509597  | 3.130618  |
| 24               | 1                | 0              | 0.154286                | 4.354879  | 3.339740  |
| 25               | 6                | 0              | 0.626340                | 3.672340  | -0.979445 |
| 26               | 1                | 0              | 0.575927                | 3.469128  | -2.063960 |
| 27               | 1                | 0              | -0.161092               | 4.402357  | -0.736137 |
| 28               | 6                | 0              | 2.180345                | 5.416740  | -1.285608 |
| 29               | 1                | 0              | 2.179406                | 5.312074  | -2.383040 |
| 30               | 1                | 0              | 3.175123                | 5.734228  | -0.961252 |
| 31               | 1                | 0              | 1.449325                | 6.194940  | -1.013446 |
| 32               | 6                | 0              | 1.487742                | 1.301798  | -0.499507 |
| 33               | 1                | 0              | 1.883241                | 1.449817  | -1.514591 |
| 34               | 1                | 0              | 2.344847                | 1.378601  | 0.178319  |
| 35               | 6                | 0              | 0.743215                | -0.008321 | -0.388835 |
| 36               | 6                | 0              | 1.143277                | -1.302764 | -0.174099 |
| 37               | 6                | 0              | 2.490792                | -1.855698 | -0.019685 |
| 38               | 6                | 0              | 3.596152                | -1.260217 | -0.658060 |
| 39               | 1                | 0              | 3.442827                | -0.400969 | -1.302344 |
| 40               | 6                | 0              | 4.879539                | -1.779135 | -0.498870 |
| 41               | 1                | 0              | 5.715259                | -1.303033 | -1.005219 |
| 42               | 6                | 0              | 5.092928                | -2.909012 | 0.292766  |
| 43               | 1                | 0              | 6.094030                | -3.313927 | 0.412586  |
| 44               | 6                | 0              | 4.006416                | -3.515129 | 0.927427  |
| 45               | 1                | 0              | 4.158424                | -4.392918 | 1.550035  |
| 46               | 6                | 0              | 2.724459                | -2.993325 | 0.777745  |
| 47               | 1                | 0              | 1.889757                | -3.457201 | 1.297216  |
| 48               | 8                | 0              | -0.689948               | 3.526514  | 1.620258  |
| 49               | 8                | 0              | 1.902146                | 4.191684  | -0.643885 |
| 50               | 34               | 0              | -0.389087               | -2.412853 | -0.074569 |

### Coordinates for optimized geometry of cation radical of PhCSPH

| Center<br>Number | Atomic<br>Number | Atomic<br>Type | Coordinates (Angstroms) |           |           |
|------------------|------------------|----------------|-------------------------|-----------|-----------|
|                  |                  |                | X                       | Y         | Z         |
| 1                | 6                | 0              | -2.976186               | -0.765394 | -0.269649 |
| 2                | 6                | 0              | -3.717245               | -1.869082 | 0.233648  |
| 3                | 1                | 0              | -3.194868               | -2.714276 | 0.673351  |
| 4                | 6                | 0              | -5.101307               | -1.867829 | 0.210994  |
| 5                | 1                | 0              | -5.649405               | -2.715035 | 0.610617  |
| 6                | 6                | 0              | -5.792474               | -0.769706 | -0.319965 |
| 7                | 1                | 0              | -6.878115               | -0.770143 | -0.338247 |
| 8                | 6                | 0              | -5.084452               | 0.326562  | -0.827487 |
| 9                | 1                | 0              | -5.620203               | 1.171575  | -1.248275 |
| 10               | 6                | 0              | -3.697967               | 0.336589  | -0.801975 |
| 11               | 1                | 0              | -3.166950               | 1.179573  | -1.223796 |
| 12               | 6                | 0              | -1.539530               | -0.775465 | -0.245088 |
| 13               | 6                | 0              | -0.629680               | 0.294838  | -0.384902 |
| 14               | 6                | 0              | -0.815395               | 1.782525  | -0.541710 |
| 15               | 1                | 0              | -1.598797               | 2.199225  | 0.096954  |
| 16               | 1                | 0              | -1.080038               | 2.020807  | -1.582998 |
| 17               | 6                | 0              | 0.580215                | 2.375145  | -0.175180 |
| 18               | 6                | 0              | 0.601981                | 2.766927  | 1.314221  |
| 19               | 1                | 0              | 0.481984                | 1.868388  | 1.946687  |
| 20               | 1                | 0              | 1.577627                | 3.216833  | 1.549072  |
| 21               | 6                | 0              | -0.460542               | 4.175743  | 2.884582  |
| 22               | 1                | 0              | -0.602010               | 3.364004  | 3.614463  |
| 23               | 1                | 0              | -1.298703               | 4.872157  | 2.956447  |
| 24               | 1                | 0              | 0.471807                | 4.706688  | 3.125504  |
| 25               | 6                | 0              | 0.923482                | 3.589539  | -1.043586 |
| 26               | 1                | 0              | 0.805072                | 3.332638  | -2.111716 |
| 27               | 1                | 0              | 0.232423                | 4.415135  | -0.816438 |
| 28               | 6                | 0              | 2.669427                | 5.126428  | -1.458041 |
| 29               | 1                | 0              | 2.617530                | 4.991978  | -2.549177 |
| 30               | 1                | 0              | 3.705186                | 5.319131  | -1.170221 |
| 31               | 1                | 0              | 2.050104                | 5.991925  | -1.180636 |
| 32               | 6                | 0              | 1.585047                | 1.202485  | -0.400076 |
| 33               | 1                | 0              | 2.048240                | 1.282837  | -1.393052 |
| 34               | 1                | 0              | 2.404302                | 1.214415  | 0.325935  |
| 35               | 6                | 0              | 0.726573                | -0.033580 | -0.308353 |
| 36               | 6                | 0              | 1.027303                | -1.397153 | -0.104531 |
| 37               | 6                | 0              | 2.304410                | -2.045095 | 0.017051  |
| 38               | 6                | 0              | 3.497066                | -1.413690 | -0.426902 |
| 39               | 1                | 0              | 3.453020                | -0.437900 | -0.892723 |
| 40               | 6                | 0              | 4.720611                | -2.056678 | -0.312442 |
| 41               | 1                | 0              | 5.620915                | -1.565589 | -0.668026 |
| 42               | 6                | 0              | 4.796402                | -3.335991 | 0.251742  |
| 43               | 1                | 0              | 5.757648                | -3.832600 | 0.343061  |
| 44               | 6                | 0              | 3.632387                | -3.977633 | 0.697373  |
| 45               | 1                | 0              | 3.691114                | -4.966508 | 1.140719  |
| 46               | 6                | 0              | 2.405922                | -3.346371 | 0.579433  |
| 47               | 1                | 0              | 1.515037                | -3.843054 | 0.953944  |
| 48               | 8                | 0              | -0.445765               | 3.681129  | 1.555286  |
| 49               | 8                | 0              | 2.259540                | 3.955177  | -0.770772 |
| 50               | 34               | 0              | -0.582041               | -2.392098 | 0.004338  |
